# Supplementary material for: PRISM: A Shelter-Based Partnership for People Experiencing Homelessness and Severe Mental Illness
Source: Atypon-hosted journal article supplement (doi:10.1176/appi.ps.202000682), 2021-08-04

**Supplementary Table 1: Housing and services outcomes**

|                                                                                                               | n   | %     |
|---------------------------------------------------------------------------------------------------------------|-----|-------|
| <b>Housing</b>                                                                                                |     |       |
| <i>Permanent housing</i>                                                                                      | 303 | 52.3  |
| Autonomous housing                                                                                            | 188 | 32.5  |
| Supervised housing                                                                                            | 85  | 14.7  |
| Living with a family member                                                                                   | 30  | 5.2   |
| <i>Temporary housing</i>                                                                                      | 63  | 10.9  |
| Transitional program                                                                                          | 63  | 10.9  |
| <i>Inpatient treatment/drug or alcohol rehabilitation</i>                                                     | 91  | 15.7  |
| Hospital                                                                                                      | 79  | 13.6  |
| Drug or alcohol rehabilitation                                                                                | 12  | 2.1   |
| <i>Not reaffiliated to housing</i>                                                                            | 122 | 21.1  |
| Homeless                                                                                                      | 115 | 19.9  |
| Detention                                                                                                     | 7   | 1.2   |
| Total                                                                                                         | 579 | 100.0 |
| <b>Services<sup>a</sup></b>                                                                                   |     |       |
| <i>Full medical and psychosocial services</i>                                                                 | 392 | 67.7  |
| Transitional Assertive Community Treatment (ACT) team for people experiencing homelessness (SII) <sup>b</sup> | 45  | 7.8   |
| Assertive Community Treatment (ACT)                                                                           | 77  | 13.3  |
| Intensive Case Management (ICM)                                                                               | 41  | 7.1   |
| Outpatient psychiatry follow-up                                                                               | 207 | 35.8  |
| Family doctor and front-line services                                                                         | 22  | 3.8   |
| <i>Specific services</i>                                                                                      | 25  | 4.3   |
| Addiction follow-up                                                                                           | 20  | 3.5   |
| Asylum seekers programs                                                                                       | 4   | 0.7   |
| Neurodevelopmental services                                                                                   | 1   | 0.2   |
| <i>Community psychosocial services</i>                                                                        | 107 | 18.5  |
| Shelter psychosocial services                                                                                 | 37  | 6.4   |
| Community psychosocial and housing services                                                                   | 70  | 12.1  |
| <i>Other</i>                                                                                                  | 20  | 3.5   |
| Homeless outreach services                                                                                    | 15  | 2.6   |
| Unknown services in country of origin (outside of Canada)                                                     | 5   | 0.9   |
| > 1 follow-up                                                                                                 | 52  | 9.0   |
| No follow-up                                                                                                  | 87  | 15.0  |
| Total                                                                                                         | 579 | 100   |
| <b>Transfer to both housing and services</b>                                                                  |     |       |
| Permanent housing with services                                                                               | 290 | 50.1  |
| Temporary housing with services                                                                               | 61  | 10.5  |

<sup>a</sup> Some participants were involved with more than one service at program discharge.

<sup>b</sup> SII (Suivi Intensif Itinérance) is a shelter-based ACT team designed to address the needs of persons unable to access the PRISM program because they refuse to stay at the shelter, are excluded for behavioral problems, or necessitate a more intensive and less time-limited approach.

**Supplementary Figure 1: Flow diagram of PRISM users**

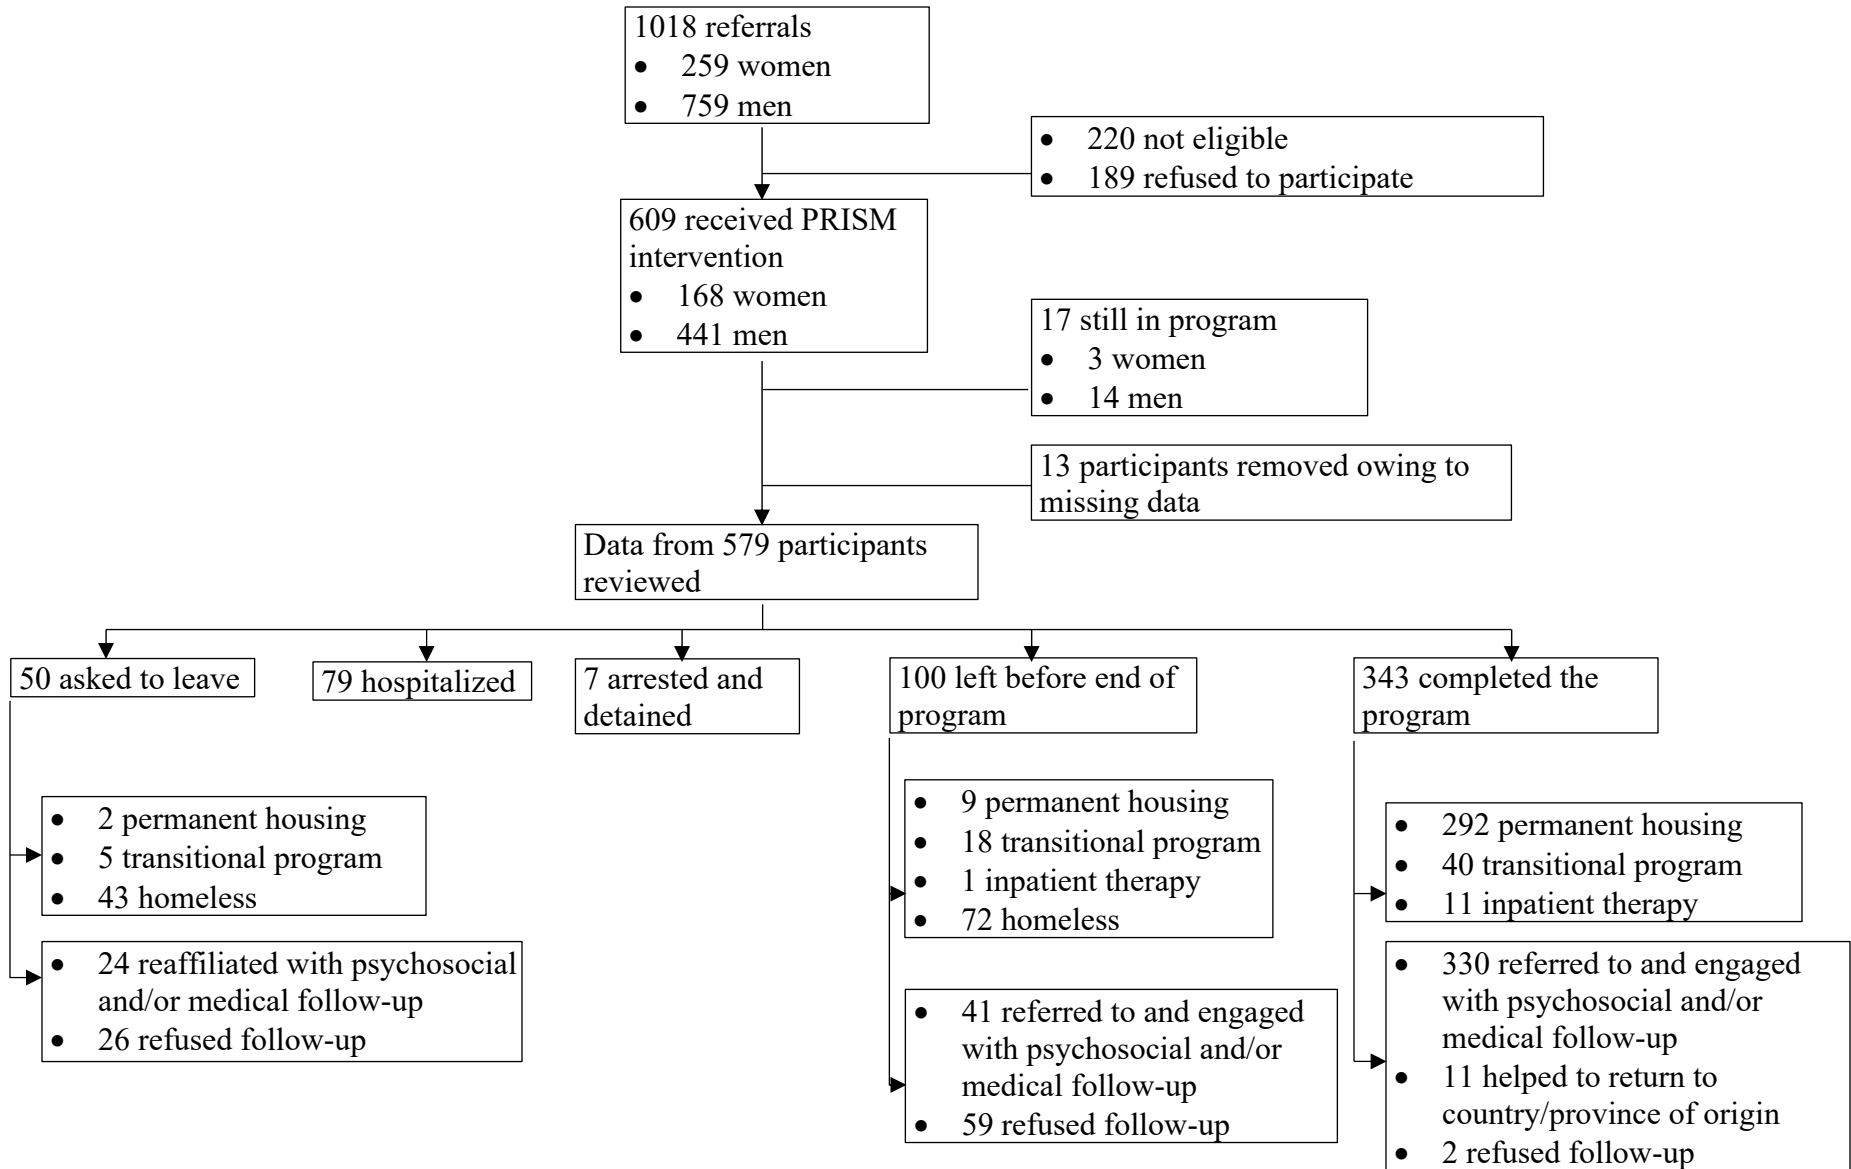

Supplement: appi.ps.202000682.ds001.pdf [file appi.ps.202000682.ds001.pdf]
